# Supplementary material for: Exposure–Response Modeling and Simulation of Progression‐Free Survival and Adverse Events of Sorafenib Treatment in Patients With Advanced Thyroid Cancer
Source: PubMed Central journal article supplement — Clin Transl Sci. 2019 Apr 12;12(5):459–69. doi: 10.1111/cts.12634 (PMC6742948; doi:10.1111/cts.12634), 2019-04-12
Supplement: CTS-12-459-s001.pdf [file CTS-12-459-s001.pdf]

**Supplementary Table 1. Studies Included in the Population Pharmacokinetic Analysis**

| <b>Study Number</b> | <b>ClinicalTrials.gov Registration</b> | <b>Clinical Trial Phase</b> | <b>Participants or Type of Cancer</b> | <b>Participants, n</b> | <b>Pharmacokinetic Observations, n</b> | <b>Trial Name; Primary Reference</b>                               |
|---------------------|----------------------------------------|-----------------------------|---------------------------------------|------------------------|----------------------------------------|--------------------------------------------------------------------|
| 100483              | NA                                     | 1                           | Healthy volunteers                    | 24                     | 332                                    | Relative bioavailability, data on file (internal report #MRR 1653) |
| 100484              | NA                                     | 1                           | Healthy volunteers                    | 15                     | 206                                    | Food effect study, data on file (internal report #MRR 1650)        |
| 10874               | NCT00044512                            | 2                           | HCC                                   | 28                     | 194                                    | Abou-Alfa et al <sup>1</sup>                                       |
| 11515               | NCT00661375                            | 2                           | RCC                                   | 98                     | 151                                    | Naito S, et al <sup>2</sup>                                        |
| 11559               | NCT00586105                            | 2                           | RCC                                   | 39                     | 328                                    |                                                                    |
| 14295               | NCT00984282                            | 3                           | DTC                                   | 156                    | 156                                    | DECISION;<br>Brose M, et al <sup>3</sup>                           |
| 100554              | NCT00105443                            | 3                           | HCC                                   | 190                    | 335                                    | SHARP;<br>Llovet J, et al <sup>4</sup>                             |
| 11849               | NCT00492752                            | 3                           | HCC                                   | 29                     | 229                                    | Asia Pacific;<br>Cheng AL, et al <sup>5</sup>                      |
| 11213               | NCT00073307                            | 3                           | RCC                                   | 195                    | 363                                    | TARGET;<br>Escudier B, et al <sup>6</sup>                          |
| 14898               | NCT01098760                            | 4                           | HCC                                   | 85                     | 847                                    | HATT;<br>Lin S, et al <sup>7</sup>                                 |

DTC=differentiated thyroid cancer; HCC=hepatocellular carcinoma; NA=not applicable; RCC=renal cell carcinoma.

1. Abou-Alfa GK, Schwartz L, Ricci S, et al. Phase II study of sorafenib in patients with advanced hepatocellular carcinoma. *J Clin Oncol.* 2006;24:4293-4300.
2. Naito S, Tsukamoto T, Murai M, Fukino K, Akaza H. Overall survival and good tolerability of long-term use of sorafenib after cytokine treatment: final results of a phase II trial of sorafenib in Japanese patients with metastatic renal cell carcinoma. *BJU Int.* 2011;108:1813-1819.

3. Brose MS, Nutting CM, Jarzab B, et al. Sorafenib in radioactive iodine-refractory, locally advanced or metastatic differentiated thyroid cancer: a randomised, double-blind, phase 3 trial. *Lancet*. 2014;384:319-328.
4. Llovet JM, Ricci S, Mazzaferro V, et al. Sorafenib in advanced hepatocellular carcinoma. *N Engl J Med*. 2008;359:378-390.
5. Cheng AL, Kang YK, Chen Z, et al. Efficacy and safety of sorafenib in patients in the Asia-Pacific region with advanced hepatocellular carcinoma: a phase III randomised, double-blind, placebo-controlled trial. *Lancet Oncol*. 2009;10:25-34.
6. Escudier B, Eisen T, Stadler WM, et al. Sorafenib in advanced clear-cell renal-cell carcinoma. *N Engl J Med*. 2007;356:125-134.
7. Lin SM, Lu SN, Chen PT, et al. HATT: a phase IV, single-arm, open-label study of sorafenib in Taiwanese patients with advanced hepatocellular carcinoma. *Hepatol Int*. 2017;11:199-208.
