# Supplementary material for: Exposure–Response Modeling and Simulation of Progression‐Free Survival and Adverse Events of Sorafenib Treatment in Patients With Advanced Thyroid Cancer
Source: PubMed Central journal article supplement — Clin Transl Sci. 2019 Apr 12;12(5):459–69. doi: 10.1111/cts.12634 (PMC6742948; doi:10.1111/cts.12634), 2019-04-12
Supplement: CTS-12-459-s002.pdf [file CTS-12-459-s002.pdf]

**Table S2. Patient Demographics and Baseline Clinical Characteristics\* by Type of Study Participant**

| Characteristic         | Differentiated                         |                                    |                              | Healthy Volunteers<br>(n=39) | All Participants<br>(N=859) |
|------------------------|----------------------------------------|------------------------------------|------------------------------|------------------------------|-----------------------------|
|                        | Hepatocellular<br>Carcinoma<br>(n=332) | Renal Cell<br>Carcinoma<br>(n=332) | Thyroid<br>Cancer<br>(n=156) |                              |                             |
| Sex, n (%)             |                                        |                                    |                              |                              |                             |
| Male                   | 275 (83)                               | 250 (75)                           | 84 (54)                      | 39 (100)                     | 648 (75)                    |
| Female                 | 57 (17)                                | 82 (25)                            | 72 (46)                      | 0 (0)                        | 211 (25)                    |
| Race, n (%)            |                                        |                                    |                              |                              |                             |
| Asian                  | 129 (39)                               | 141 (42)                           | 32 (21)                      | 1 (3)                        | 303 (35)                    |
| Non-Asian              | 203 (61)                               | 191 (58)                           | 124 (79)                     | 38 (97)                      | 556 (65)                    |
| Age, y                 | 65 (21–97)                             | 60 (23–86)                         | 61 (24–81)                   | 62 (62–62)                   | 62 (21–97)                  |
| Weight, kg             | 70 (37–127)                            | 70 (34–140)                        | 77 (39–140)                  | 64.8 (64.8–64.8)             | 70 (34–140)                 |
| BMI, kg/m <sup>2</sup> | 24.8 (14.7–41.5)                       | 25.5 (15.7–49.6)                   | 26.8 (17.4–45)               | 23.8 (23.8–23.8)             | 25 (14.7–49.6)              |
| CLCR, mL/min           | 100 (20–150)                           | 70.4 (20.6–150)                    | 93.6 (29.8–150)              | 81.5 (81.5–81.5)             | 83.7 (20–150)               |
| PT-INR                 | 1.1 (0.9–3.4)                          | 1 (0.8–4.8)                        | 1 (0.8–1.8)                  | 1.1 (1.09–1.09)              | 1.1 (0.8–4.8)               |
| LDH, U/L               | 222 (96–3,310)                         | 202 (28–1,570)                     | 240 (240–240)                | 241 (241–241)                | 236 (28–3,310)              |
| Albumin, g/L           | 3.8 (2.1–5.26)                         | 4.2 (1.8–5.36)                     | 4 (2.9–5.1)                  | 3.9 (3.9–3.9)                | 4 (1.8–5.36)                |
| SGOT, U/L              | 65.5 (17–401)                          | 23 (8–126)                         | 21 (11–111)                  | 51 (51–51)                   | 31 (8–401)                  |
| SGPT, U/L              | 47 (7–266)                             | 22 (5–246)                         | 21 (8–88)                    | 38 (38–38)                   | 29 (5–266)                  |

|                                       |                 |                |               |               |                 |
|---------------------------------------|-----------------|----------------|---------------|---------------|-----------------|
| Total bilirubin, U/L                  | 0.7 (0.08–5.11) | 0.5 (0.1–2.3)  | 0.5 (0.2–1.3) | 0.7 (0.7–0.7) | 0.7 (0.08–5.11) |
| ALP, U/L                              | 146 (47–1,260)  | 118 (16–1,960) | 123 (123–123) | 123 (123–123) | 123 (16–1,960)  |
| Use of concomitant medications, n (%) |                 |                |               |               |                 |
| CYP3A4 inhibitors                     | 80 (24)         | 41 (12)        | 16 (10)       | 0             | 137 (16)        |
| CYP3A4 inducers                       | 36 (11)         | 46 (14)        | 23 (15)       | 0             | 105 (12)        |
| UGT1A9 inhibitors                     | 2 (1)           | 1 (<1)         | 1 (1)         | 0             | 4 (<1)          |
| UGT1A9 inducers                       | 19 (6)          | 12 (4)         | 8 (5)         | 0             | 39 (5)          |
| Thyroxine                             | 16 (5)          | 14 (4)         | 154 (99)      | 0             | 184 (21)        |

---

ALP=alkaline phosphatase; BMI=body mass index; CLCR=creatinine clearance; CYP=cytochrome P450; LDH=lactate dehydrogenase; PT-INR=prothrombin time-international normalized ratio; SGOT=serum glutamic oxaloacetic transaminase (aspartate aminotransferase); SGPT=serum glutamic pyruvic transaminase (alanine aminotransferase); UGT=uridine 5'-diphosphoglucuronosyl-transferase.

\*Values are given as median (range), unless otherwise indicated; missing values were imputed to be median values for an appropriate population.
