# Supplementary material for: Exposure–Response Modeling and Simulation of Progression‐Free Survival and Adverse Events of Sorafenib Treatment in Patients With Advanced Thyroid Cancer
Source: PubMed Central journal article supplement — Clin Transl Sci. 2019 Apr 12;12(5):459–69. doi: 10.1111/cts.12634 (PMC6742948; doi:10.1111/cts.12634), 2019-04-12
Supplement: CTS-12-459-s003.pdf [file CTS-12-459-s003.pdf]

**Table S3. Final Covariate Model Parameter Estimates**

| Parameter        | Descriptor                            | Estimate | 95% CI       | Bootstrap 95% |
|------------------|---------------------------------------|----------|--------------|---------------|
|                  |                                       |          |              | CI            |
| $\theta_1$       | CL/F, L·h <sup>-1</sup>               | 9.4      | 8.9 to 9.9   | 9.0 to 9.9    |
| $\theta_2$       | V <sub>1</sub> /F, L                  | 554.0    | 440 to 668   | 463 to 667    |
| $\theta_3$       | k <sub>tr</sub> , h <sup>-1</sup>     | 1.0      | 0.9 to 1.2   | 0.9 to 1.2    |
| $\theta_4$       | Proportional error                    | 0.3      | 0.3 to 0.4   | 0.3 to 0.4    |
| $\theta_5$       | Additive error                        | 0, fixed | NC           | NC            |
| $\theta_6$       | Proportional error single-observation | 0.5      | 0.5 to 0.6   | 0.5 to 0.6    |
| $\theta_7$       | F <sub>1</sub> , phase 1              | 1.9      | 1.6 to 2.3   | 1.7 to 2.3    |
| $\theta_8$       | CL <sub>cov,females</sub>             | -0.2     | -0.3 to -0.1 | -0.3 to -0.1  |
| $\theta_9$       | CL <sub>cov,study 14295</sub>         | -0.5     | -0.6 to -0.5 | -0.6 to -0.4  |
| $\omega_{1,1}^2$ | IIV, CL                               | 0.2      | 0.2 to 0.3   | 0.2 to 0.3    |
| $\omega_{2,2}^2$ | IIV, V <sub>1</sub>                   | 0.4      | 0.2 to 0.7   | 0.3 to 0.6    |
| $\sigma_{1,1}^2$ | Residual error                        | 1, fixed | NC           | NC            |

$\theta$ =parameter estimate for population average;  $\omega$ =random effects parameter estimate;  $\sigma$ =residual

error model parameter estimate; CL=clearance; CL/F=apparent oral clearance; F<sub>1</sub>=relative

bioavailability; IIV=interindividual variability; k<sub>tr</sub>=transit rate constant; NC=not calculated;

V<sub>1</sub>=volume of distribution; V<sub>1</sub>/F=apparent volume of distribution.
