# Supplementary material for: Exposure–Response Modeling and Simulation of Progression‐Free Survival and Adverse Events of Sorafenib Treatment in Patients With Advanced Thyroid Cancer
Source: PubMed Central journal article supplement — Clin Transl Sci. 2019 Apr 12;12(5):459–69. doi: 10.1111/cts.12634 (PMC6742948; doi:10.1111/cts.12634), 2019-04-12

**Figure S3.** Visual predictive check of the final covariate pharmacokinetic model. Dots represent prediction-corrected data. Solid black lines indicate observed median values, and dashed black lines indicate 5th and 95th percentiles of the observed data. Shaded areas indicate the 95% CIs around the prediction-corrected median values indicated by the solid blue line and 5th and 95th percentiles of the prediction indicated by red dashed lines.

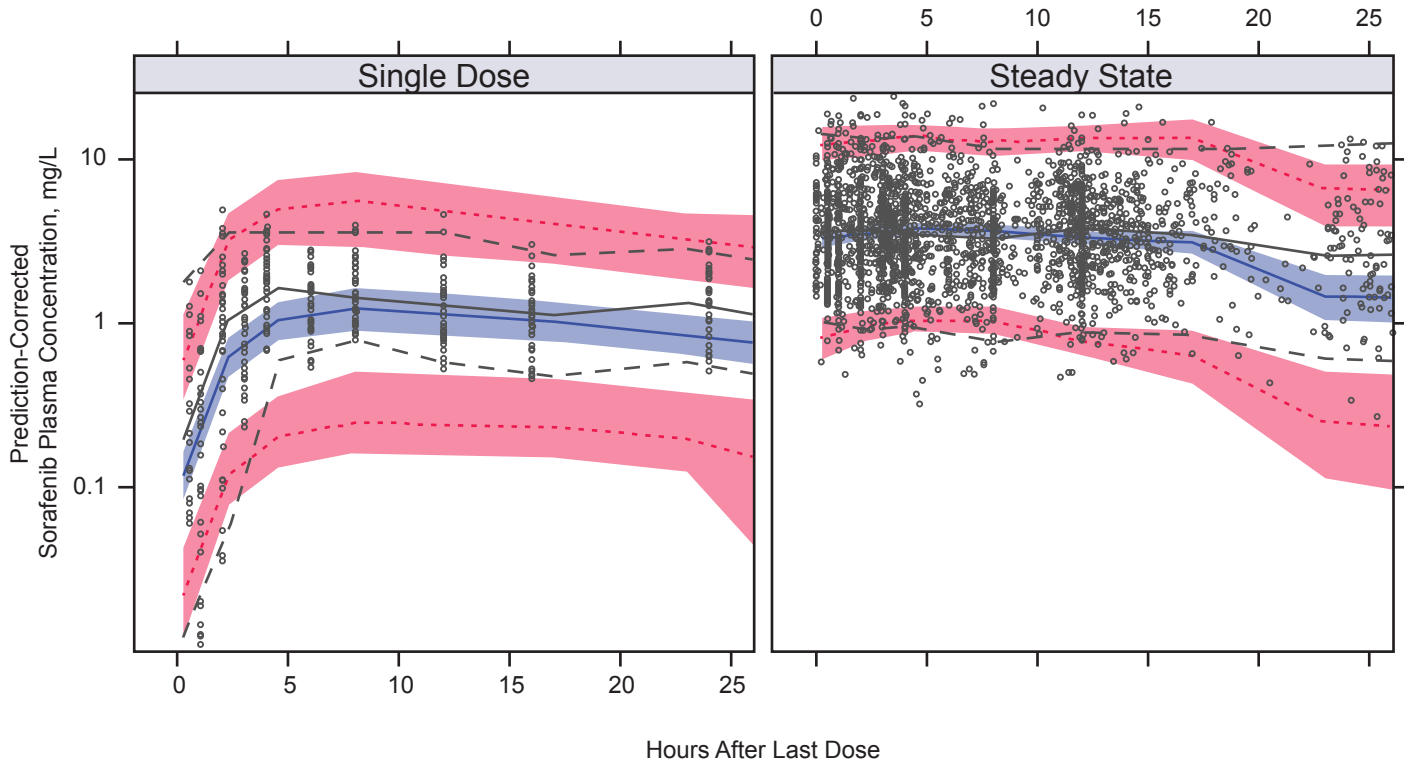

Supplement: CTS-12-459-s006.pdf [file CTS-12-459-s006.pdf]
