# Supplementary material for: Exposure–Response Modeling and Simulation of Progression‐Free Survival and Adverse Events of Sorafenib Treatment in Patients With Advanced Thyroid Cancer
Source: PubMed Central journal article supplement — Clin Transl Sci. 2019 Apr 12;12(5):459–69. doi: 10.1111/cts.12634 (PMC6742948; doi:10.1111/cts.12634), 2019-04-12

**Figure S6.** Distribution of the average sorafenib dose (DOSAV), the average sorafenib exposure over the 12-hour dosing interval during the entire treatment period (AUC<sub>12AV</sub>), and the average sorafenib exposure in cycle 1 (AV\_AUC\_12) among (A) differentiated thyroid cancer histology categories (papillary, follicular-hurthle cell, follicular – other and poorly differentiated) and (B) age quartiles. Each box covers the interquartile range (IQR), with the median as the vertical black line inside the box, and with the whiskers extending to the last data point within the 1.5 times the IQR. Data outside 1.5 x IQR are shown individually.

**A**

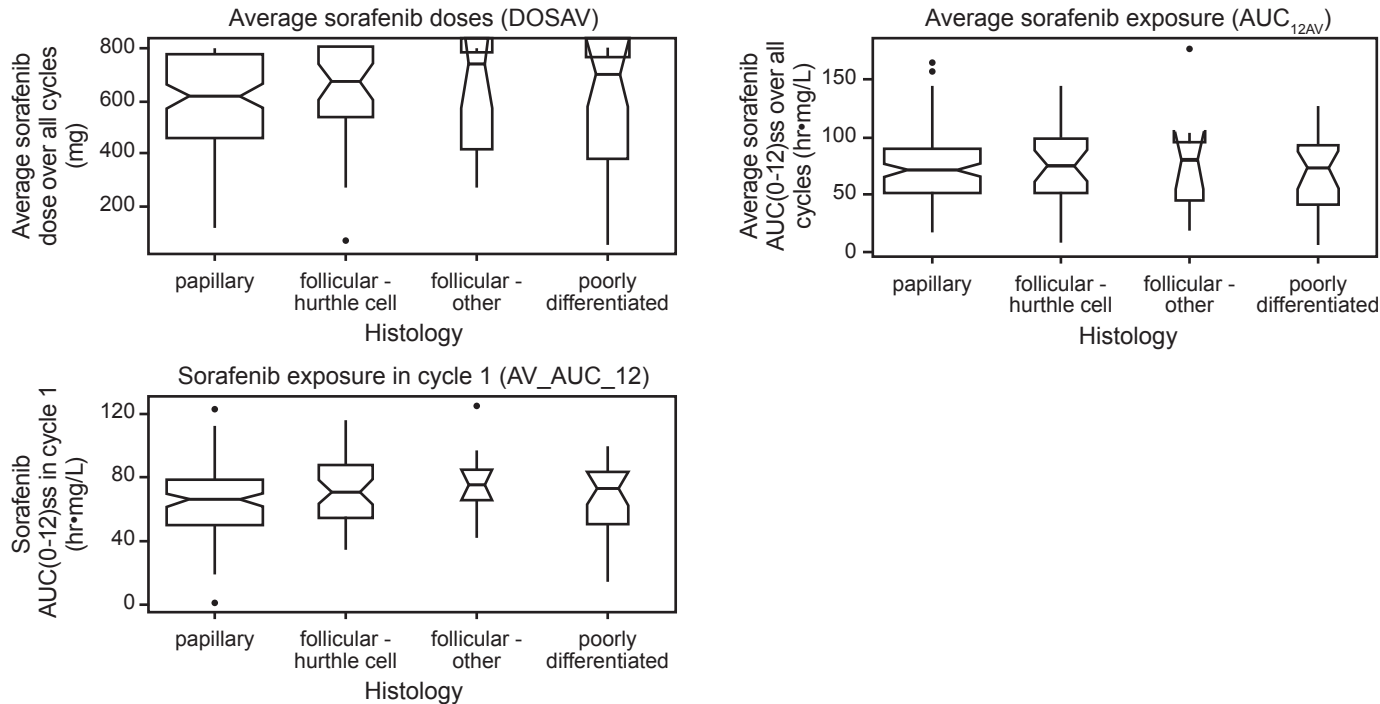

**B**

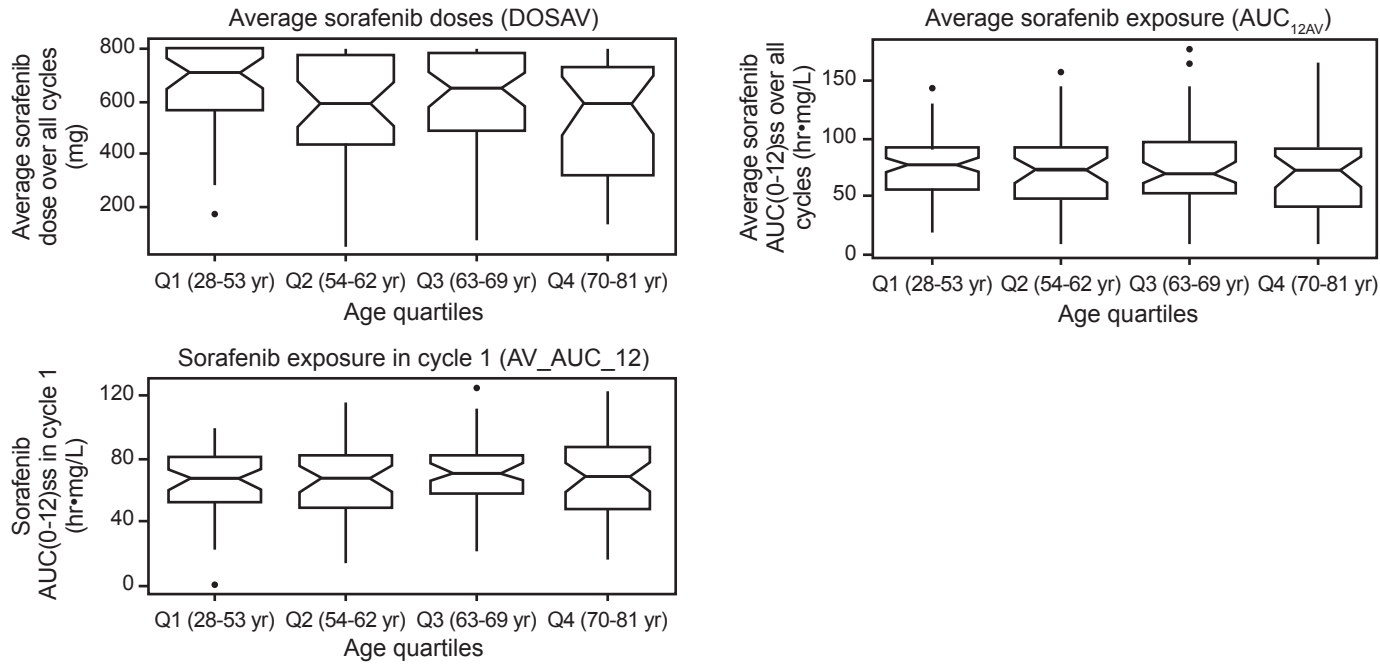

Supplement: CTS-12-459-s009.pdf [file CTS-12-459-s009.pdf]
