# Supplementary figures and images for: Exposure–Response Modeling and Simulation of Progression‐Free Survival and Adverse Events of Sorafenib Treatment in Patients With Advanced Thyroid Cancer
Source: PubMed Central journal article supplement — Clin Transl Sci. 2019 Apr 12;12(5):459–69. doi: 10.1111/cts.12634 (PMC6742948; doi:10.1111/cts.12634), 2019-04-12

**Figure S7.** Schematic representation of the four simulation scenarios.

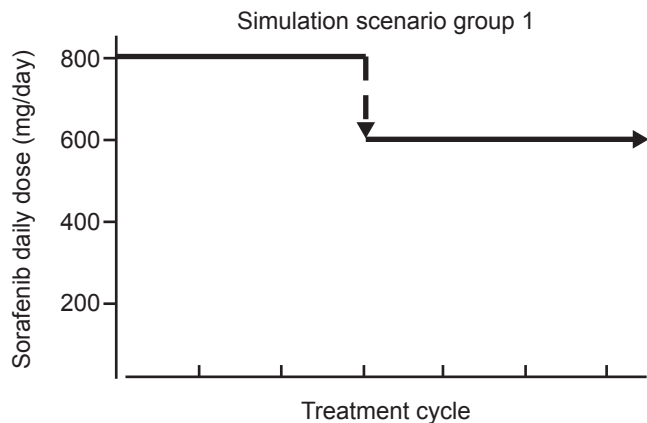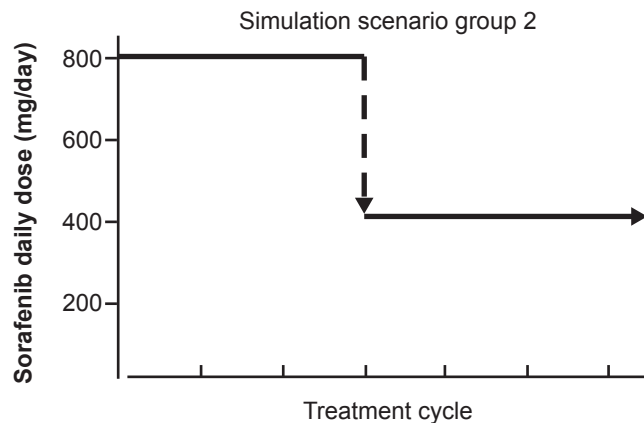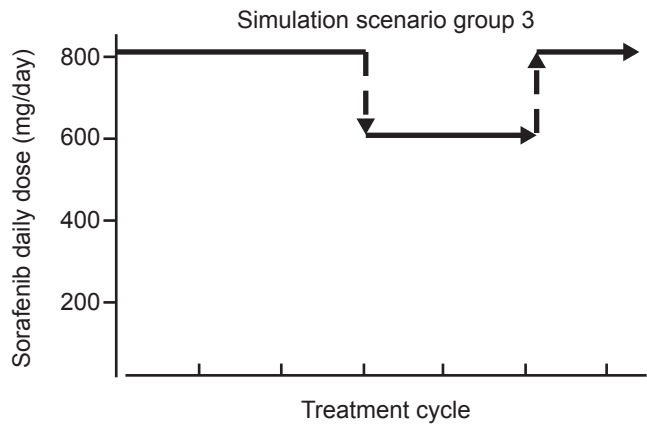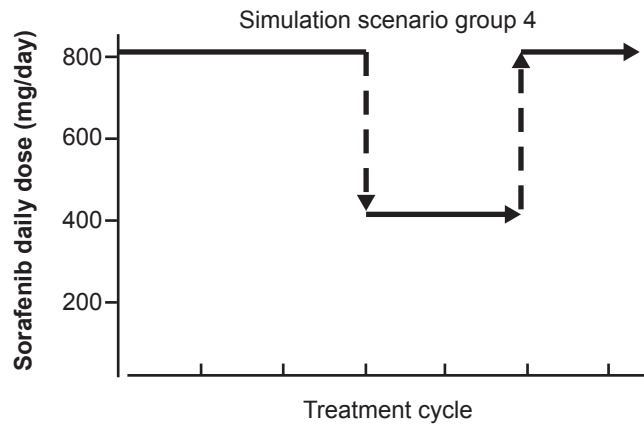

Supplement: CTS-12-459-s010.pdf [file CTS-12-459-s010.pdf]
